# Supplementary material
Source: PubMed Central journal article supplement (PMC4156907)
Supplement: NIHMS612916-supplement-01.pdf [file NIHMS612916-supplement-01.pdf]

## SUPPLEMENTAL FIGURES AND LEGENDS

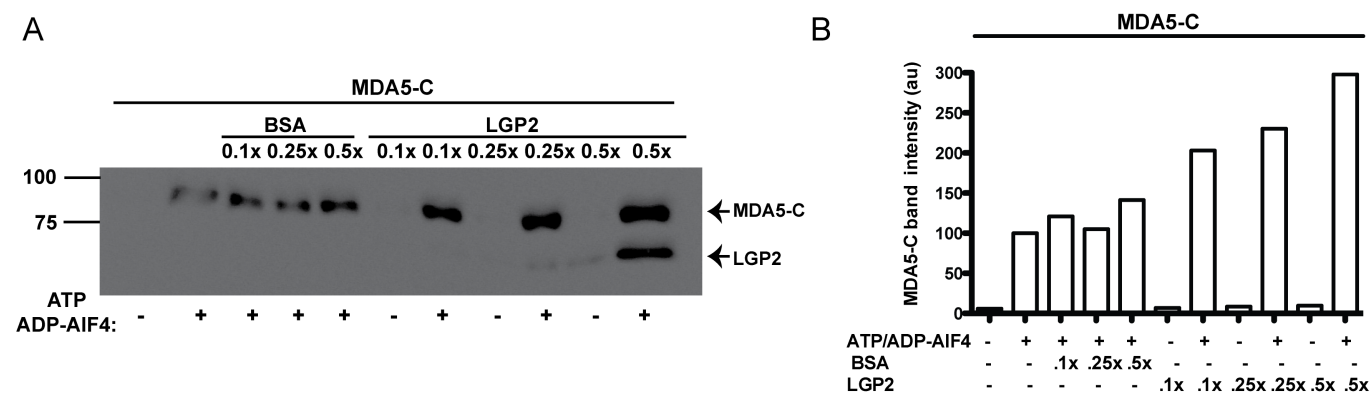

**Figure S1. LGP2 enhancement of MDA5-RNA interaction requires ATP/ ADP-AIF<sub>4</sub> conditions, related to Figure 2.**

- A. Biotinylated poly(I:C) binding experiment conducted as in Figure 2A, comparing MDA5 pulldown and effects of LGP2 in buffer containing 500 $\mu$ M ATP prior to quenching with ADP-AIF<sub>4</sub> immediately prior to denaturation (+) to parallel samples in buffer lacking both ATP and ADP-AIF<sub>4</sub> (-).
- B. Quantification of MDA5 band intensity from panel A. Data are normalized to the signal of MDA5 alone in the ATP/ ADP-AIF<sub>4</sub> conditions.

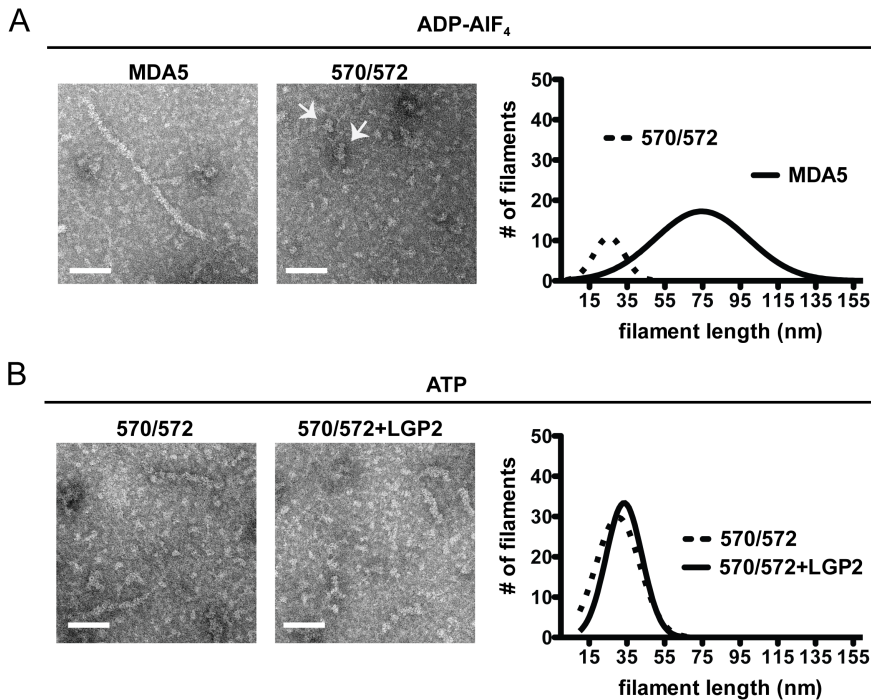

**Figure S2. Additional analysis of the monomer-interface mutant, MDA5-570/572, related to Figure 3.**

Electron micrographs (left) and quantification (right) of filaments formed by MDA5-570/572. As MDA5-570/572 filaments were scarce, images were taken specifically of fields that contained quasi-filaments, and the length distribution from 14 such images was quantified.

A. Direct comparison of WT and mutant MDA5. Electron micrographs illustrating MDA5 and MDA5-570/572 complexes formed under filament-favoring conditions and concentration (0.1 $\mu$ M). From 14 random selected images of MDA5, 137 filaments were measured with an average length of 75nm, while images selected to contain structures of MDA5-570/572 contained only 55 filaments with an average length of 25nm. Graph of filament lengths demonstrates obvious defect in generating structures longer than 18nm that could be quantified. MDA5-570/572 is impaired in filament formation and is not affected by LGP2.

B. Electron micrographs illustrating MDA5-570/572-dsRNA interactions and quasi-filaments at 3 fold higher concentration (0.3 $\mu$ M) than MDA5-WT used in panel A. For MDA5-570/572 alone, 80 filaments were measured with an average length of 30nm. For the mixed MDA5-570/572 and LGP2 sample, 77 filaments were measured with an average length of 34nm. Addition of LGP2 does not alter the quasi-filament length distribution.

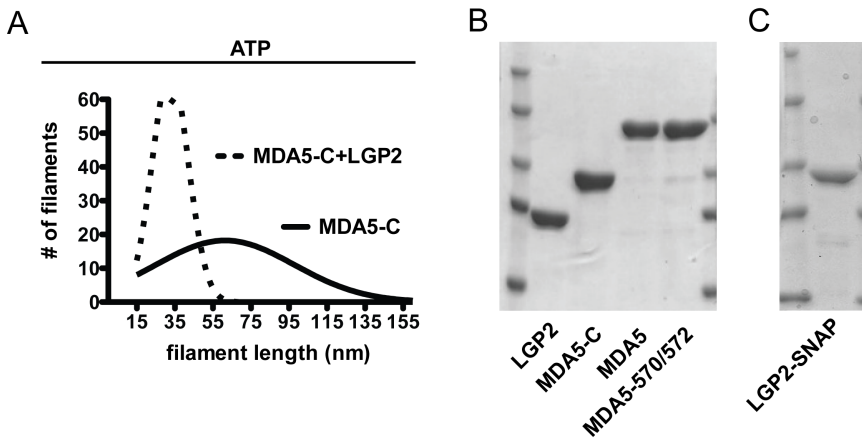

**Figure S3. LGP2 purified from mammalian cells attenuates MDA5 filament formation (related to Figure 4).**

Experiment conducted as in Figure 4 using an LGP2-SNAP fusion protein purified from transfected HEK293T cells.

- A. Effect of LGP2 on MDA5 filament formation in ATP hydrolysis conditions. Similar to panel C of Figure 4, comparing MDA5-C alone to MDA5-C+LGP2 in the presence of ATP. Graph of filament size distributions is presented at right for 13 random images. For MDA5-C alone, 160 filaments were measured with an average length of 61nm. For the mixed MDA5-C+LGP2 sample, 185 filaments were measured with an average length of 33nm.
- B. SDS-PAGE and Coomassie blue staining showing purity of proteins LGP2, MDA5-C, MDA5, and MDA5-570/572 isolated from baculovirus infected Sf9 cells.
- C. SDS-PAGE and Coomassie staining of LGP2-SNAP purified from HEK293T cells.

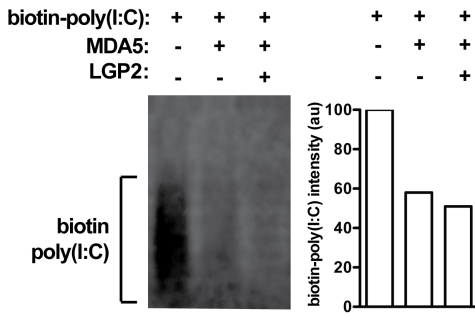

**Figure S4. Quantification of biotin-poly(I:C)-RNP transfection efficiency, related to Figure 5.**

293T cells were transfected with RNPs as in Figure 5. RNPs were assembled with 3 $\mu$ g total poly(I:C), with 2 $\mu$ g unlabeled poly(I:C) and 1 $\mu$ g biotinylated poly(I:C). Total RNA was harvested and analyzed by Northern blot followed by probing with HRP-conjugated streptavidin to detect transfected biotin-poly(I:C) (panel A). Naked poly(I:C) has a much higher transfection efficiency than RNP complexes, but RNPs containing MDA5 or MDA5+LGP2 display similar transfection efficiency. Panel B. Quantification of biotin-poly(I:C) signal..
